# Supplementary material for: Pan-cancer profiling of tumor-infiltrating natural killer cells through transcriptional reference mapping
Source: PubMed Central journal article supplement (PMC11291284; doi:10.1038/s41590-024-01884-z), 2024-07-02
Supplement: 41590_2024_1884_MOESM1_ESM.pdf [file 41590_2024_1884_MOESM1_ESM.pdf]

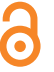

# **Pan-cancer profiling of tumor-infiltrating natural killer cells through transcriptional reference mapping**

---

In the format provided by the authors and unedited

---

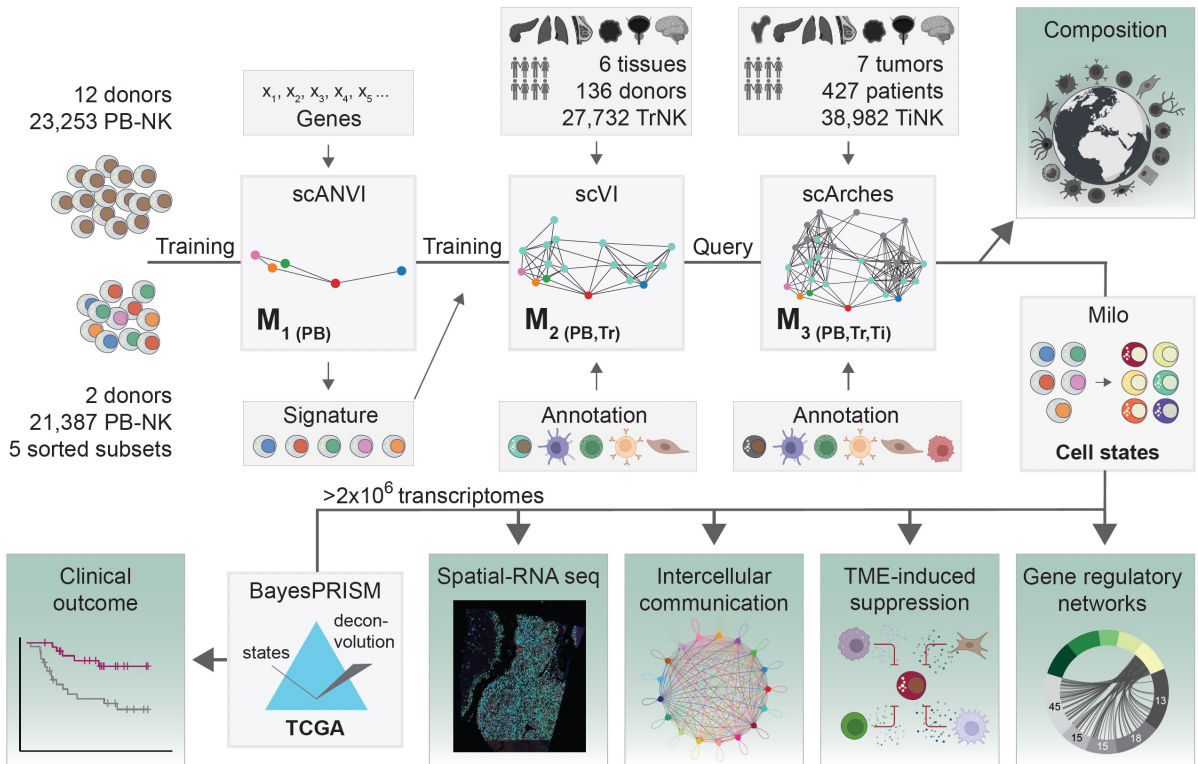

**Supplementary Fig. 1: Graphical abstract.**

Visualization of analysis workflow. The figure was partly generated using Biorender.

## Supplementary tables

### Supplementary table 1

Data containing NK cells from peripheral blood.

| Dataset                                       | Number of donors | Platform | Comment             | Citation                    |
|-----------------------------------------------|------------------|----------|---------------------|-----------------------------|
| Bulk PB NK cells                              | 5                | 10x      | Lab A in figure 1A  | This manuscript             |
| Sorted PB NK cells<br>and bulk PB NK<br>cells | 2                | 10x      | Lab B in figure 1A  | This manuscript             |
| Bulk PB NK cells                              | 3                | 10x      | Lab C in figure 1A  | Crinier et al. <sup>1</sup> |
| Bulk PB NK cells                              | 2                | 10x      | Lab D ini figure 1A | Yang et al. <sup>2</sup>    |

## Supplementary table 2

Data containing NK cells from normal tissue.

| Dataset     | Tissue type | # patients | Platform | Comment                                                                                                                                                           | Citation                       |
|-------------|-------------|------------|----------|-------------------------------------------------------------------------------------------------------------------------------------------------------------------|--------------------------------|
| Bulk tissue | Lung        | 7          | 10x      | Tumor-adjacent normal lung samples, three from same patients as supplementary table 3                                                                             | Lambrechts et al. <sup>3</sup> |
| Bulk tissue | Lung        | 4          | 10x      | Tumor-adjacent normal lung samples, three from same patients as supplementary table 3                                                                             | Chan et al. <sup>4</sup>       |
| Bulk tissue | Lung        | 10         | 10x      | Tumor-adjacent normal lung samples, same patients as supplementary table 3                                                                                        | Bischoff et al. <sup>5</sup>   |
| Bulk tissue | Lung        | 7          | 10x      | Tumor-adjacent normal lung samples, same patients as supplementary table 3                                                                                        | Goveia et al. <sup>6</sup>     |
| Bulk tissue | Lung        | 11         | 10x      | Tumor-adjacent normal lung samples, same patients as supplementary table 3                                                                                        | Kim et al. <sup>7</sup>        |
| Bulk tissue | Lung        | 5          | 10x      | Tumor-adjacent normal lung samples, same patients as supplementary table 3                                                                                        | He et al. <sup>8</sup>         |
| Bulk tissue | Lung        | 42         | 10x      | Tumor-adjacent normal lung samples, same patients as supplementary table 3                                                                                        | Leader et al. <sup>9</sup>     |
| Bulk tissue | Pancreas    | 11         | 10x      | 3 cases of non-pancreatic tumor patients (e.g. bile duct tumors or duodenal tumors) and 8 cases of non-malignant pancreatic tumor patients (e.g. pancreatic cyst) | Peng et al. <sup>10</sup>      |
| Bulk tissue | Pancreas    | 3          | 10x      | adjacent/normal                                                                                                                                                   | Steele et al. <sup>11</sup>    |
| Bulk tissue | Pancreas    | 3          | 10x      | adjacent/normal                                                                                                                                                   | Chen et al. <sup>12</sup>      |
| Bulk tissue | Prostate    | 10         | 10x      |                                                                                                                                                                   | Tuong et al. <sup>13</sup>     |
| Bulk tissue | Prostate    | 4          | 10x      |                                                                                                                                                                   | Heidegger et al. <sup>14</sup> |
| Bulk tissue | Breast      | 10         | 10x      | GEO: GSE161529                                                                                                                                                    | Bhat et al. <sup>15</sup>      |
| Bulk tissue | Brain       | 4          | 10x      |                                                                                                                                                                   | Siletti et al. <sup>16</sup>   |
| Bulk tissue | Skin        | 3          | 10x      | GEO: GSE169147                                                                                                                                                    | Damskey et al. <sup>17</sup>   |
| Bulk tissue | Skin        | 6          | 10x      | GEO: GSE193304                                                                                                                                                    | He et al.                      |
| Bulk tissue | Skin        | 3          | 10x      | GEO: GSE160536                                                                                                                                                    | Mirizio et al. <sup>18</sup>   |
| Bulk tissue | Skin        | 4          | 10x      | GEO: GSE173205                                                                                                                                                    | Rindler et al.                 |
| Bulk tissue | Skin        | 4          | 10x      | GEO: GSE138669                                                                                                                                                    | Xue et al. <sup>19</sup>       |

### Supplementary table 3

Data containing NK cells from tumor tissue.

| Dataset  | Tumor type         | # patients | Platform | Comment                | Accession                                                           | Citation                         |
|----------|--------------------|------------|----------|------------------------|---------------------------------------------------------------------|----------------------------------|
| Bulk TME | Lung (NSCLC)       | 8          | 10x      |                        | ArrayExpress: E-MTAB-6149 (5 patients) and E-MTAB-6653 (3 patients) | Lambrechts et al. <sup>3</sup>   |
| Bulk TME | Lung (NSCLC)       | 7          | inDrop   |                        | GEO: GSE127465                                                      | Zilionis et al. <sup>20</sup>    |
| Bulk TME | Lung (NSCLC)       | 16         | 10x      | HTAN                   |                                                                     | Chan et al. <sup>4</sup>         |
| Bulk TME | Lung (NSCLC)       | 10         | 10x      |                        | DOI: 10.24433/CO.0121060.v1                                         | Bischoff et al. <sup>5</sup>     |
| Bulk TME | Lung (NSCLC)       | 49         | 10x      | scRNA-seq and CITE-seq | GEO: GSE154826                                                      | Leader et al. <sup>9</sup>       |
| Bulk TME | Lung (NSCLC)       | 5          | 10x      |                        | GSA: CRA001963                                                      | He et al. <sup>8</sup>           |
| Bulk TME | Lung (NSCLC)       | 11         | 10x      |                        | SRA: PRJNA634159                                                    | Chen et al. <sup>21</sup>        |
| Bulk TME | Lung (NSCLC)       | 8          | 10x      |                        | ArrayExpress: E-MTAB-6308                                           | Goveia et al. <sup>6</sup>       |
| Bulk TME | Lung (NSCLC)       | 11         | 10x      |                        | GEO: GSE131907                                                      | Kim et al. <sup>7</sup>          |
| Bulk TME | Lung (NSCLC)       | 42         | 10x      |                        | GEO: GSE148071                                                      | Wu et al. <sup>22</sup>          |
| Bulk TME | Pancreas (PDAC)    | 24         | 10x      |                        | GSA: CRA001160                                                      | Peng et al. <sup>10</sup>        |
| Bulk TME | Pancreas (PDAC)    | 10         | 10x      |                        | GEO: GSE154778                                                      | Lin et al. <sup>23</sup>         |
| Bulk TME | Pancreas (PDAC)    | 16         | 10x      |                        | GEO: GSE155698                                                      | Steele et al. <sup>11</sup>      |
| Bulk TME | Pancreas (PDAC)    | 6          | 10x      |                        | GEO: GSE212966                                                      | Chen et al. <sup>12</sup>        |
| Bulk TME | Melanoma           | 3          | 10x      | Skin                   | GEO:GSE215120                                                       | Zhang et al. <sup>24</sup>       |
| Bulk TME | Melanoma           | 8          | 10x      | Skin                   |                                                                     | Smalley et al. <sup>25</sup>     |
| Bulk TME | Glioblastoma (GBM) | 4          | 10x      |                        | GEO: GSE162631                                                      | Xie et al. <sup>26</sup>         |
| Bulk TME | Glioblastoma (GBM) | 7          | 10x      |                        | Broad Insitute: SCP503                                              | Richards et al. <sup>27</sup>    |
| Bulk TME | Glioblastoma (GBM) | 16         | 10x      |                        | GEO: GSE182109                                                      | Abdelfattah et al. <sup>28</sup> |
| Bulk TME | Glioblastoma (GBM) | 7          | 10x      |                        | OSF: osf.io/4q32e/                                                  | Ravi et al. <sup>29</sup>        |
| Bulk TME | Glioblastoma (GBM) | 9          | 10x      |                        | GEO: GSE131928                                                      | Neftel et al. <sup>30</sup>      |
| Bulk TME | Glioblastoma (GBM) | 3          | 10x      |                        | GEO: GSE138794                                                      | Wang et al. <sup>31</sup>        |
| Bulk TME | Glioblastoma (GBM) | 3          | 10x      |                        | GEO: GSE139448                                                      | Wang et al. <sup>32</sup>        |

| Dataset  | Tumor type         | # patients | Platform | Comment                       | Accession                | Citation                       |
|----------|--------------------|------------|----------|-------------------------------|--------------------------|--------------------------------|
| Bulk TME | Glioblastoma (GBM) | 5          | 10x      |                               | Synapse: syn22257780     | Johnson et al. <sup>33</sup>   |
| Bulk TME | Glioblastoma (GBM) | 5          | 10x      |                               | GEO: GSE163108           | Mathewson et al. <sup>34</sup> |
| Bulk TME | Glioblastoma (GBM) | 13         | 10x      |                               | GEO: GSE163120           | Pombo et al. <sup>35</sup>     |
| Bulk TME | Glioblastoma (GBM) | 35         | 10x      |                               | GEO: GSE154795           | Lee et al. <sup>36</sup>       |
| Bulk TME | Glioblastoma (GBM) | 10         | 10x      |                               | GEO: GSE173278           | LeBlanc et al. <sup>37</sup>   |
| Bulk TME | Breast cancer      | 26         | 10x      |                               | GEO: GSE176078           | Wu et al. <sup>38</sup>        |
| Bulk TME | Breast cancer      | 34         | 10x      |                               | GEO: GSE161529           | Pal et al. <sup>39</sup>       |
| Bulk TME | Breast cancer      | 1          | GEXSCOPE |                               | GEO: GSE158399           | Xu et al. <sup>40</sup>        |
| Bulk TME | Breast cancer      | 5          | GEXSCOPE |                               | GEO: GSE180286           | Xu et al. <sup>41</sup>        |
| Bulk TME | Breast cancer      | 31         | 10x      | treatment-naive pre-treatment | biokey.lambrechtslab.org | Bassez et al. <sup>42</sup>    |
| Bulk TME | Prostate cancer    | 4          | 10x      |                               | GEO: GSE193337           | Heidegger et al. <sup>14</sup> |
| Bulk TME | Prostate cancer    | 13         | 10x      |                               | GEO: GSE141445           | Chen et al. <sup>43</sup>      |
| Bulk TME | Prostate cancer    | 10         | 10x      |                               |                          | Tuong et al. <sup>13</sup>     |
| Bulk TME | Sarcoma            | 11         | 10x      | Osteosarcoma                  | GEO: GSE152048           | Zhou et al. <sup>44</sup>      |
| Bulk TME | Sarcoma            | 6          | 10x      | Osteosarcoma                  | GEO: GSE162454           | Liu et al. <sup>45</sup>       |
| Bulk TME | Sarcoma            | 4          | 10x      | Osteosarcoma (TIL)            | GEO: GSE198896           | Cillo et al.                   |

### Supplementary table 4

Overview of number of cells from the various sources, including number of lymphoid cells and number of NK cells.

| Dataset          | Total cells in dataset | Lymphoid cell | NK cells |
|------------------|------------------------|---------------|----------|
| Peripheral blood |                        |               | 46303    |
| Lung tumor       | 738416                 | 344691        | 21608    |
| Breast tumor     | 445376                 | 147061        | 5130     |
| Glioblastoma     | 782101                 | 96838         | 5741     |
| Pancreas tumor   | 124380                 | 32614         | 1182     |
| Sarcoma          | 150851                 | 16328         | 1688     |
| Prostate         | 66890                  | 13131         | 549      |
| Melanoma         | 28834                  | 10754         | 3084     |
| Lung normal      | 334072                 | 119277        | 25137    |
| Breast normal    | 46314                  | 12125         | 646      |
| Pancreas normal  | 38996                  | 12584         | 673      |
| Prostate normal  | 20717                  | 6029          | 288      |
| Brain normal     |                        | 3236          | 718      |
| Skin normal      | 137683                 | 12112         | 270      |
| Total            | 2176214                | 826780        | 113017   |

### Supplementary table 5

Overview of the spatial transcriptomics data sets used

| Dataset      | Staining |                                                                                                                                                                                                                                                                 |
|--------------|----------|-----------------------------------------------------------------------------------------------------------------------------------------------------------------------------------------------------------------------------------------------------------------|
|              | Method   | Link                                                                                                                                                                                                                                                            |
| Melanoma     | IF       | <a href="https://www.10xgenomics.com/datasets/human-melanoma-if-stained-ffpe-2-standard">https://www.10xgenomics.com/datasets/human-melanoma-if-stained-ffpe-2-standard</a>                                                                                     |
| Lung tumor   | H&E      | <a href="https://www.10xgenomics.com/datasets/human-lung-cancer-ffpe-2-standard">https://www.10xgenomics.com/datasets/human-lung-cancer-ffpe-2-standard</a>                                                                                                     |
| Glioblastoma | IF       | <a href="https://www.10xgenomics.com/datasets/gene-and-protein-expression-library-of-human-glioblastoma-cytassist-ffpe-2-standard">https://www.10xgenomics.com/datasets/gene-and-protein-expression-library-of-human-glioblastoma-cytassist-ffpe-2-standard</a> |

## References

1. Crinier, A. *et al.* High-Dimensional Single-Cell Analysis Identifies Organ-Specific Signatures and Conserved NK Cell Subsets in Humans and Mice. *Immunity* **49**, 971–986.e5 (2018).
2. Yang, C. *et al.* Heterogeneity of human bone marrow and blood natural killer cells defined by single-cell transcriptome. *Nat Commun* **10**, (2019).
3. Lambrechts, D. *et al.* Phenotype molding of stromal cells in the lung tumor microenvironment. *Nat Med* **24**, 1277–1289 (2018).
4. Chan, J. M. *et al.* Signatures of plasticity, metastasis, and immunosuppression in an atlas of human small cell lung cancer. *Cancer Cell* (2021) doi:10.1016/j.ccell.2021.09.008.
5. Bischoff, P. *et al.* Single-cell RNA sequencing reveals distinct tumor microenvironmental patterns in lung adenocarcinoma. *Oncogene* **40**, 6748–6758 (2021).
6. Goveia, J. *et al.* An Integrated Gene Expression Landscape Profiling Approach to Identify Lung Tumor Endothelial Cell Heterogeneity and Angiogenic Candidates. *Cancer Cell* **37**, 21–36.e13 (2020).
7. Kim, N. *et al.* Single-cell RNA sequencing demonstrates the molecular and cellular reprogramming of metastatic lung adenocarcinoma. *Nat Commun* **11**, 2285 (2020).
8. He, D. *et al.* Single-cell RNA sequencing reveals heterogeneous tumor and immune cell populations in early-stage lung adenocarcinomas harboring EGFR mutations. *Oncogene* **40**, 355–368 (2021).
9. Leader, A. M. *et al.* Single-cell analysis of human non-small cell lung cancer lesions refines tumor classification and patient stratification. *Cancer Cell* **39**, 1594–1609.e12 (2021).
10. Peng, J. *et al.* Single-cell RNA-seq highlights intra-tumoral heterogeneity and malignant progression in pancreatic ductal adenocarcinoma. *Cell Res* **29**, 725–738 (2019).
11. Steele, N. G. *et al.* Multimodal mapping of the tumor and peripheral blood immune landscape in human pancreatic cancer. *Nat Cancer* **1**, 1097–1112 (2020).
12. Chen, K. GEO: GSE212966. <https://www.ncbi.nlm.nih.gov/geo/query/acc.cgi?acc=GSE212966>.
13. Tuong, Z. K. *et al.* Resolving the immune landscape of human prostate at a single-cell level in health and cancer. *Cell Rep* **37**, 110132 (2021).
14. Heidegger, I. *et al.* Comprehensive characterization of the prostate tumor microenvironment identifies CXCR4/CXCL12 crosstalk as a novel antiangiogenic therapeutic target in prostate cancer. *Mol Cancer* **21**, 132 (2022).
15. Bhat-Nakshatri, P. *et al.* A single-cell atlas of the healthy breast tissues reveals clinically relevant clusters of breast epithelial cells. *Cell Rep Med* **2**, 100219 (2021).
16. Siletti, K. *et al.* Transcriptomic diversity of cell types across the adult human brain. 2022.10.12.511898 <https://www.biorxiv.org/content/10.1101/2022.10.12.511898v1> (2022) doi:10.1101/2022.10.12.511898.
17. Damsky, W. *et al.* Inhibition of type 1 immunity with tofacitinib is associated with marked improvement in longstanding sarcoidosis. *Nat Commun* **13**, 3140 (2022).
18. Mirizio, E. *et al.* Single-cell transcriptome conservation in a comparative analysis of fresh and cryopreserved human skin tissue: Pilot in localized scleroderma. *Arthritis Res Ther* **22**, 263 (2020).
19. Xue, D. *et al.* Expansion of Fc $\gamma$  Receptor IIIa-Positive Macrophages, Ficolin 1-Positive Monocyte-Derived Dendritic Cells, and Plasmacytoid Dendritic Cells Associated With Severe Skin Disease in Systemic Sclerosis. *Arthritis Rheumatol* **74**, 329–341 (2022).
20. Zilionis, R. *et al.* Single-Cell Transcriptomics of Human and Mouse Lung Cancers Reveals Conserved Myeloid Populations across Individuals and Species. *Immunity* **50**, 1317–1334.e10 (2019).
21. Chen, J. *et al.* Single-cell transcriptome and antigen-immunoglobulin analysis reveals the diversity of B cells in non-small cell lung cancer. *Genome Biol* **21**, 1–21 (2020).
22. Wu, F. *et al.* Single-cell profiling of tumor heterogeneity and the microenvironment in advanced non-small cell lung cancer. *Nat Commun* **12**, 2540 (2021).



23. Lin, W. *et al.* Single-cell transcriptome analysis of tumor and stromal compartments of pancreatic ductal adenocarcinoma primary tumors and metastatic lesions. *Genome Med* **12**, 1–14 (2020).
24. Zhang, C. *et al.* A single-cell analysis reveals tumor heterogeneity and immune environment of acral melanoma. *Nat Commun* **13**, 7250 (2022).
25. Smalley, I. *et al.* Single-Cell Characterization of the Immune Microenvironment of Melanoma Brain and Leptomeningeal Metastases. *Clin Cancer Res* **27**, 4109–4125 (2021).
26. Xie, Y. *et al.* Key molecular alterations in endothelial cells in human glioblastoma uncovered through single-cell RNA sequencing. *JCI Insight* **6**, e150861.
27. Richards, L. M. *et al.* Gradient of Developmental and Injury Response transcriptional states defines functional vulnerabilities underpinning glioblastoma heterogeneity. *Nat Cancer* **2**, 157–173 (2021).
28. Abdelfattah, N. *et al.* Single-cell analysis of human glioma and immune cells identifies S100A4 as an immunotherapy target. *Nat Commun* **13**, 767 (2022).
29. Ravi, V. M. *et al.* T-cell dysfunction in the glioblastoma microenvironment is mediated by myeloid cells releasing interleukin-10. *Nat Commun* **13**, 925 (2022).
30. Neftel, C. *et al.* An Integrative Model of Cellular States, Plasticity, and Genetics for Glioblastoma. *Cell* **178**, 835–849.e21 (2019).
31. Wang, L. *et al.* The Phenotypes of Proliferating Glioblastoma Cells Reside on a Single Axis of Variation. *Cancer Discov* **9**, 1708–1719 (2019).
32. Wang, R. *et al.* Adult Human Glioblastomas Harbor Radial Glia-like Cells. *Stem Cell Reports* **14**, 338–350 (2020).
33. Johnson, K. C. *et al.* Single-cell multimodal glioma analyses identify epigenetic regulators of cellular plasticity and environmental stress response. *Nat Genet* **53**, 1456–1468 (2021).
34. Mathewson, N. D. *et al.* Inhibitory CD161 receptor identified in glioma-infiltrating T cells by single-cell analysis. *Cell* **184**, 1281–1298.e26 (2021).
35. Pombo Antunes, A. R. *et al.* Single-cell profiling of myeloid cells in glioblastoma across species and disease stage reveals macrophage competition and specialization. *Nat Neurosci* **24**, 595–610 (2021).
36. Lee, A. H. *et al.* Neoadjuvant PD-1 blockade induces T cell and cDC1 activation but fails to overcome the immunosuppressive tumor associated macrophages in recurrent glioblastoma. *Nat Commun* **12**, 6938 (2021).
37. LeBlanc, V. G. *et al.* Single-cell landscapes of primary glioblastomas and matched explants and cell lines show variable retention of inter- and intratumor heterogeneity. *Cancer Cell* **40**, 379–392.e9 (2022).
38. Wu, S. Z. *et al.* A single-cell and spatially resolved atlas of human breast cancers. *Nature genetics* **53**, 1334 (2021).
39. Pal, B. *et al.* A single-cell RNA expression atlas of normal, preneoplastic and tumorigenic states in the human breast. *EMBO J* **40**, e107333 (2021).
40. Xu, K. *et al.* Integrative analyses of scRNA-seq and scATAC-seq reveal CXCL14 as a key regulator of lymph node metastasis in breast cancer. *Hum Mol Genet* **30**, 370–380 (2021).
41. Xu, K. *et al.* Single-cell RNA sequencing reveals cell heterogeneity and transcriptome profile of breast cancer lymph node metastasis. *Oncogenesis* **10**, 66 (2021).
42. Bassez, A. *et al.* A single-cell map of intratumoral changes during anti-PD1 treatment of patients with breast cancer. *Nat Med* **27**, 820–832 (2021).
43. Chen, S. *et al.* Single-cell analysis reveals transcriptomic remodellings in distinct cell types that contribute to human prostate cancer progression. *Nat Cell Biol* **23**, 87–98 (2021).
44. Zhou, Y. *et al.* Single-cell RNA landscape of intratumoral heterogeneity and immunosuppressive microenvironment in advanced osteosarcoma. *Nat Commun* **11**, 6322 (2020).

45. Liu, Y. *et al.* Single-Cell Transcriptomics Reveals the Complexity of the Tumor Microenvironment of Treatment-Naive Osteosarcoma. *Front Oncol* **11**, 709210 (2021).
